# Supplementary material for: Pretreatment of Lignocellulosic Biomass with Cattle Rumen Fluid for Methane Production: Fate of Added Rumen Microbes and Indigenous Microbes of Methane Seed Sludge
Source: PubMed Central journal article supplement (PMC6934390; doi:10.1264/jsme2.me19113), 2019-12-27
Supplement: 34_421_s1.pdf [file 34_421_s1.pdf]

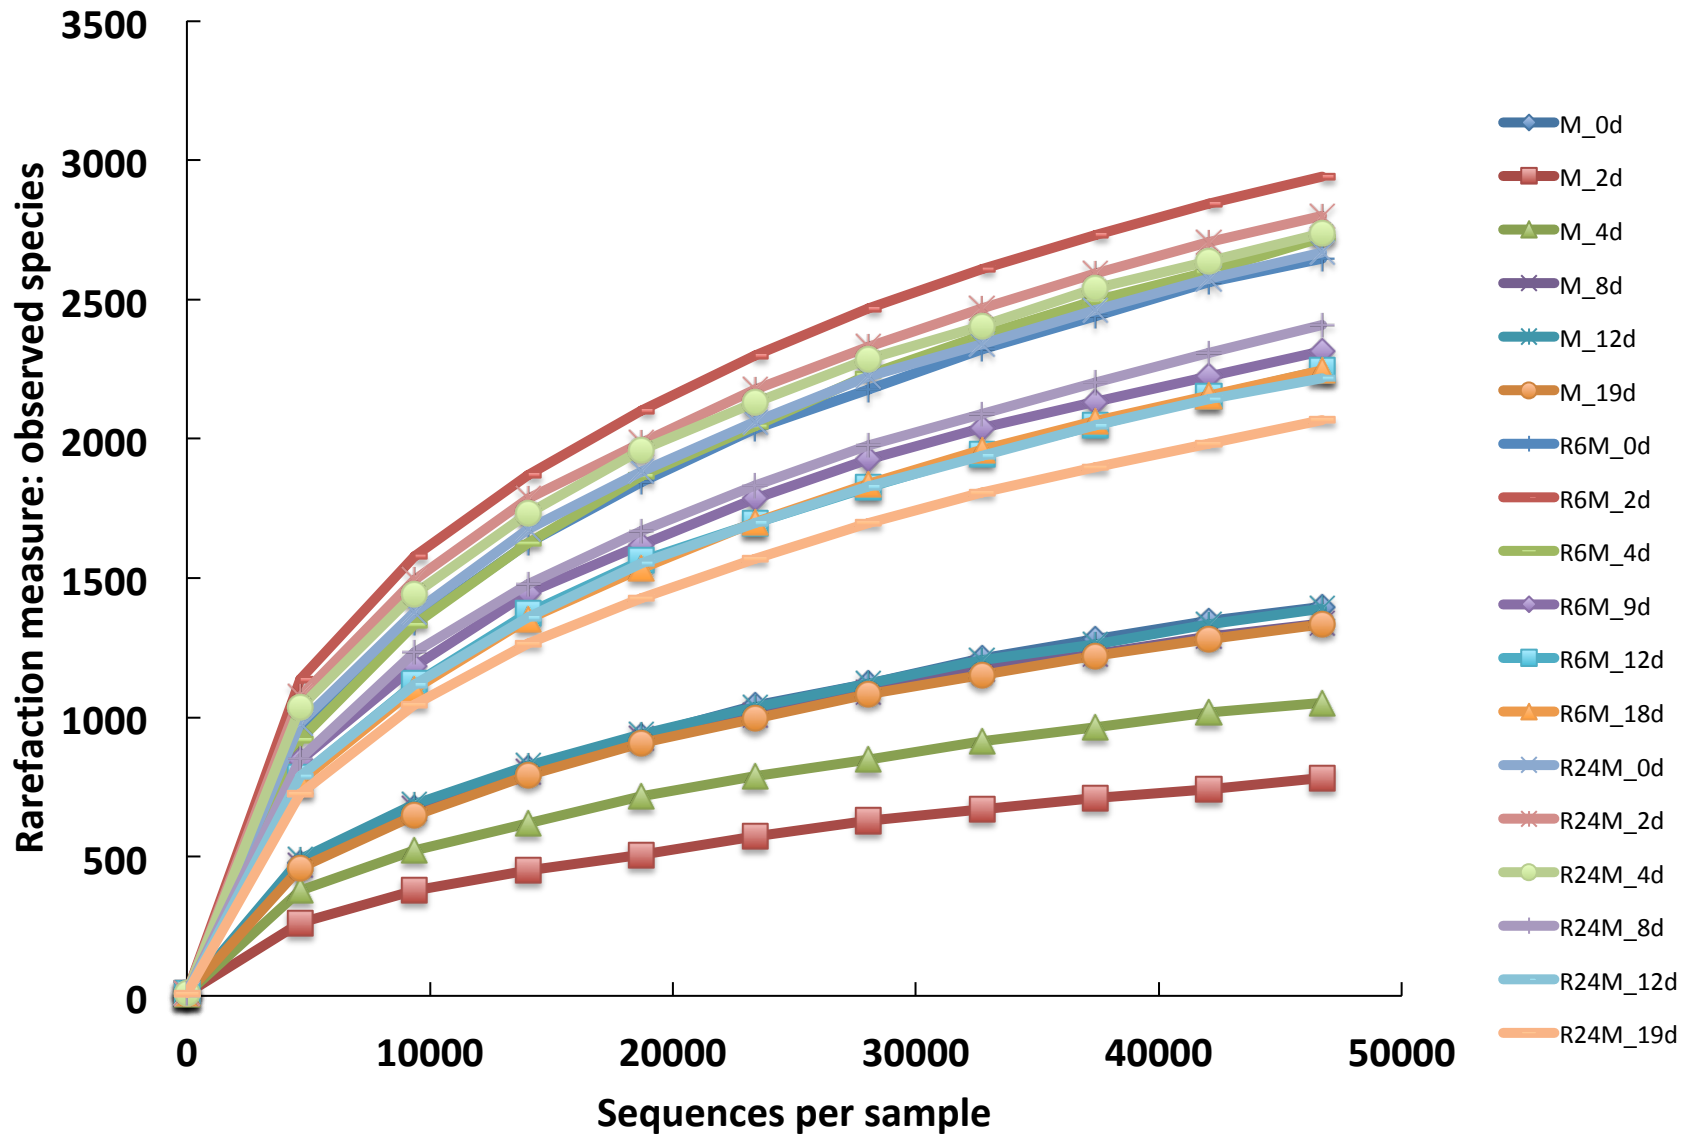

Fig. S1 (supplemental material)  
 Rarefaction curve of the bacteria in the respective samples.

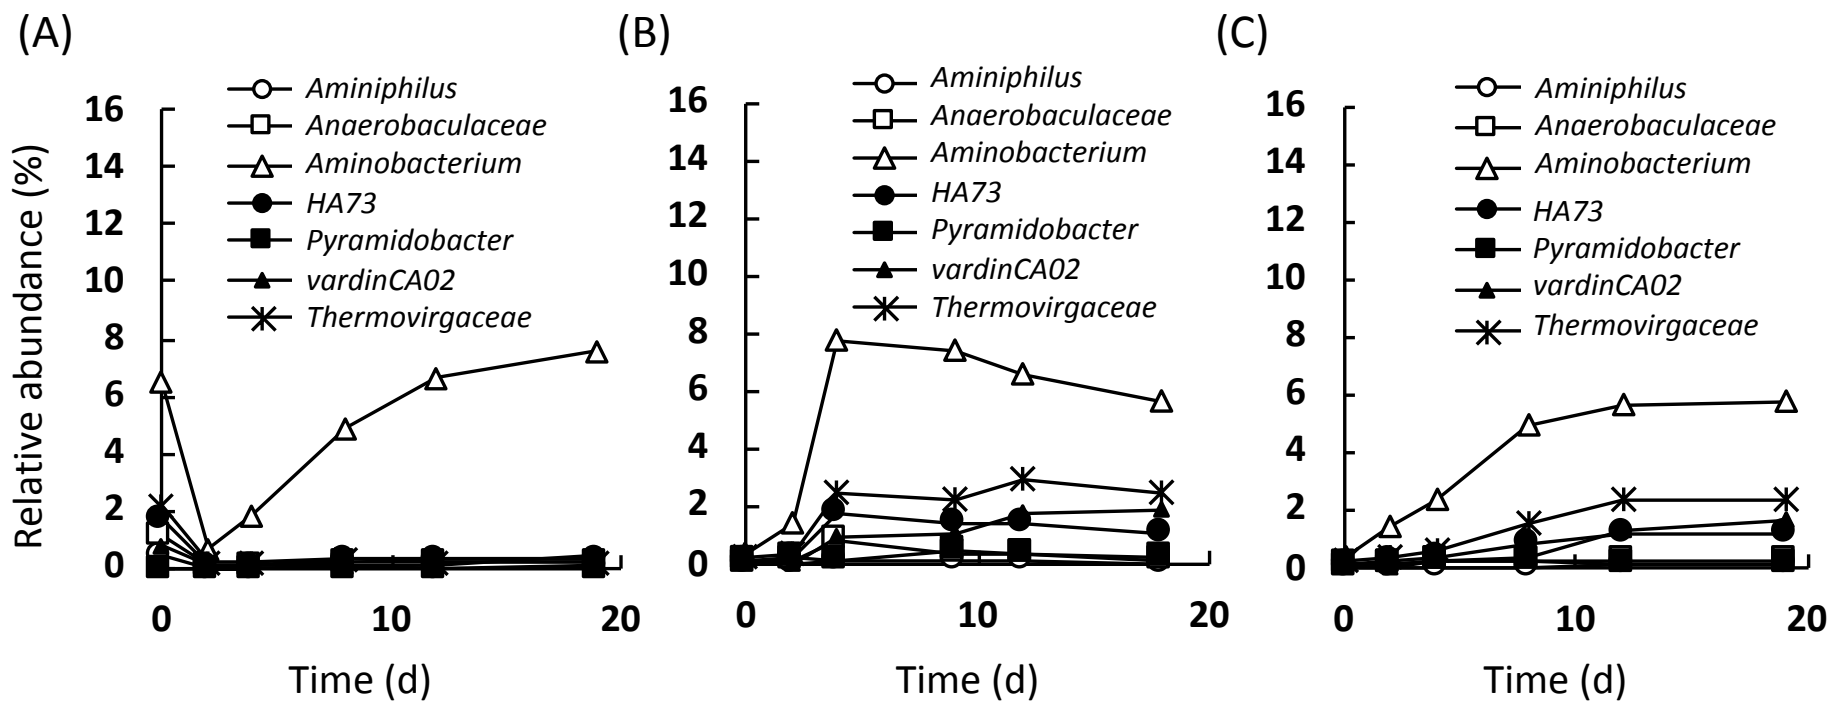

Fig. S2 (supplemental material)

*Synergistetes* taxa during methane fermentation fed untreated rapeseed (A) and rapeseed pretreated with rumen fluid for 6 h (B) and 24 h (C).

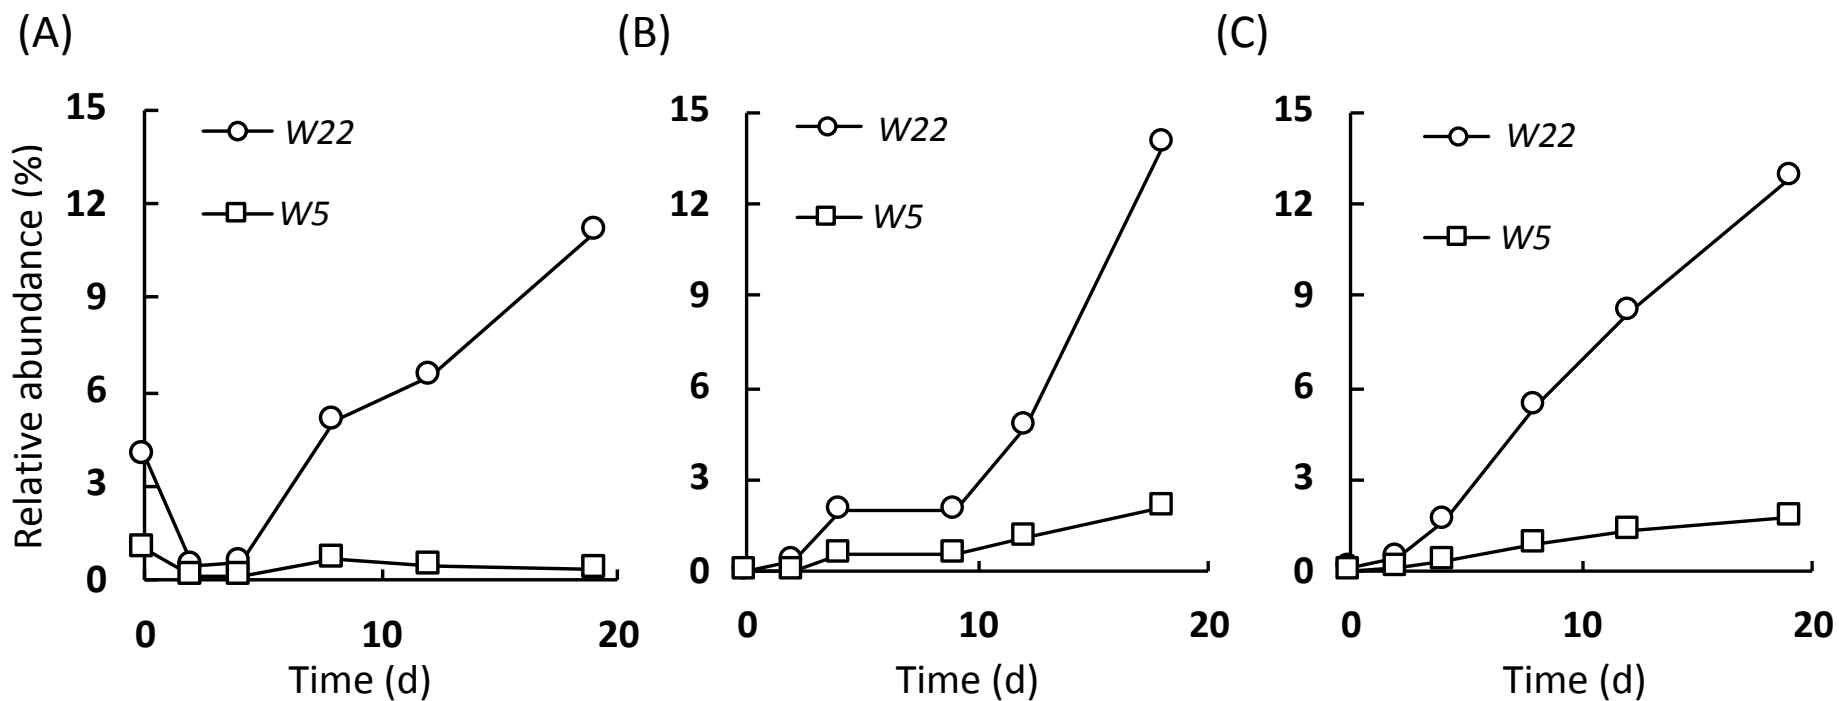

Fig. S3 (supplemental material)

*WWE1* taxa during methane fermentation fed untreated rapeseed (A) and rapeseed pretreated with rumen fluid for 6 h (B) and 24 h (C).

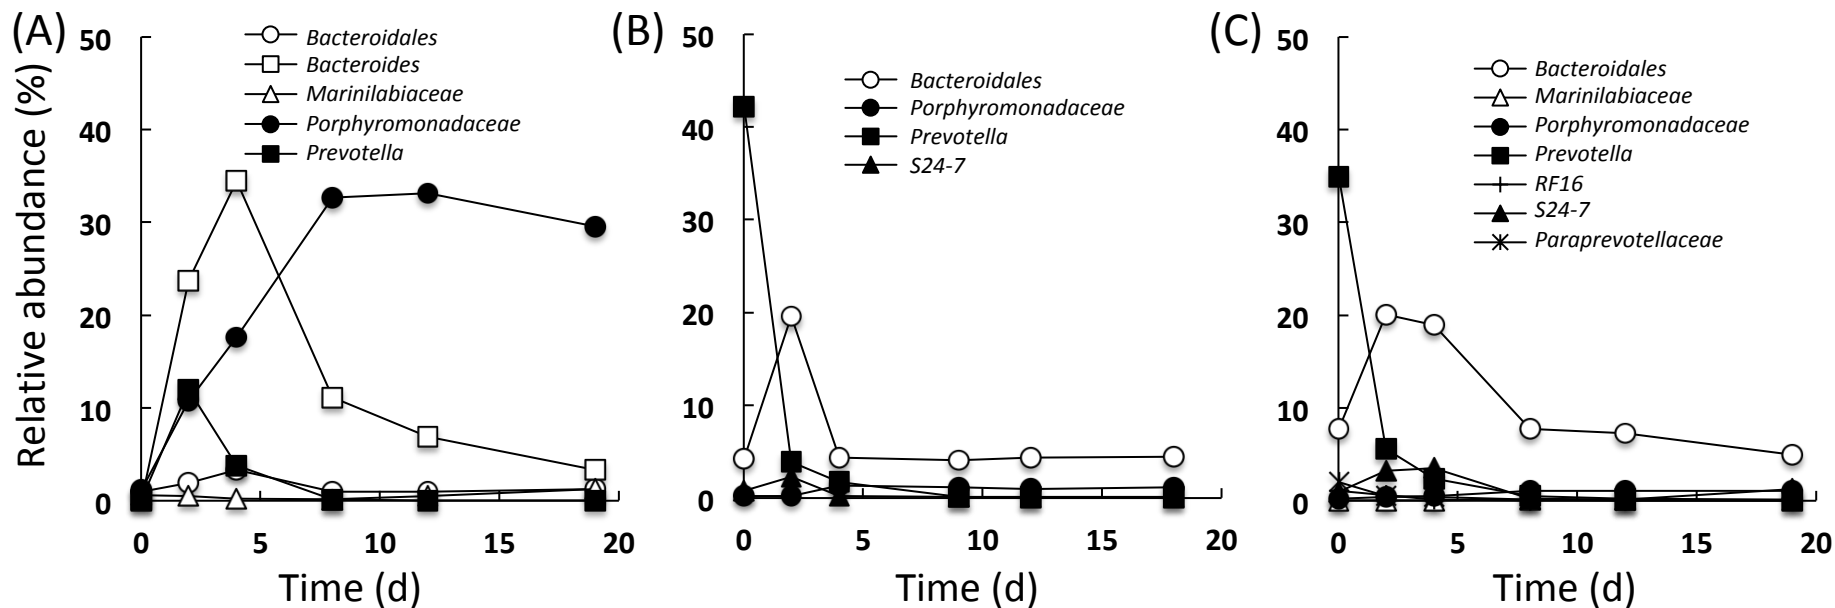

Fig. S4 (supplemental material)

*Bacteroidetes* taxa (>1.0%) during methane fermentation fed untreated rapeseed (A) and rapeseed pretreated with rumen fluid for 6 h (B) and 24 h (C).

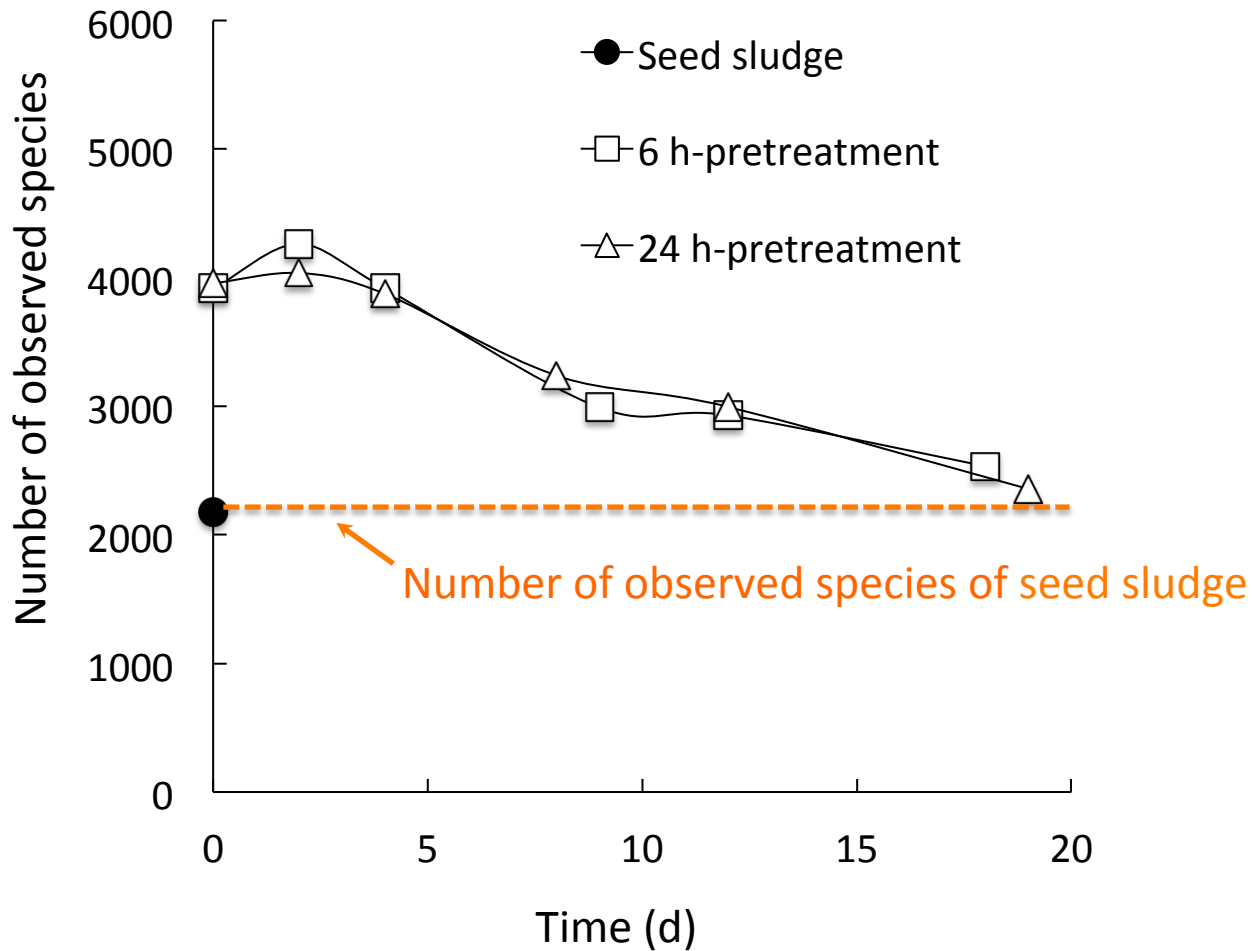

Fig. S5 (supplemental material)

Change in the number of species observed during methane fermentation after addition of the pretreatment fluid.

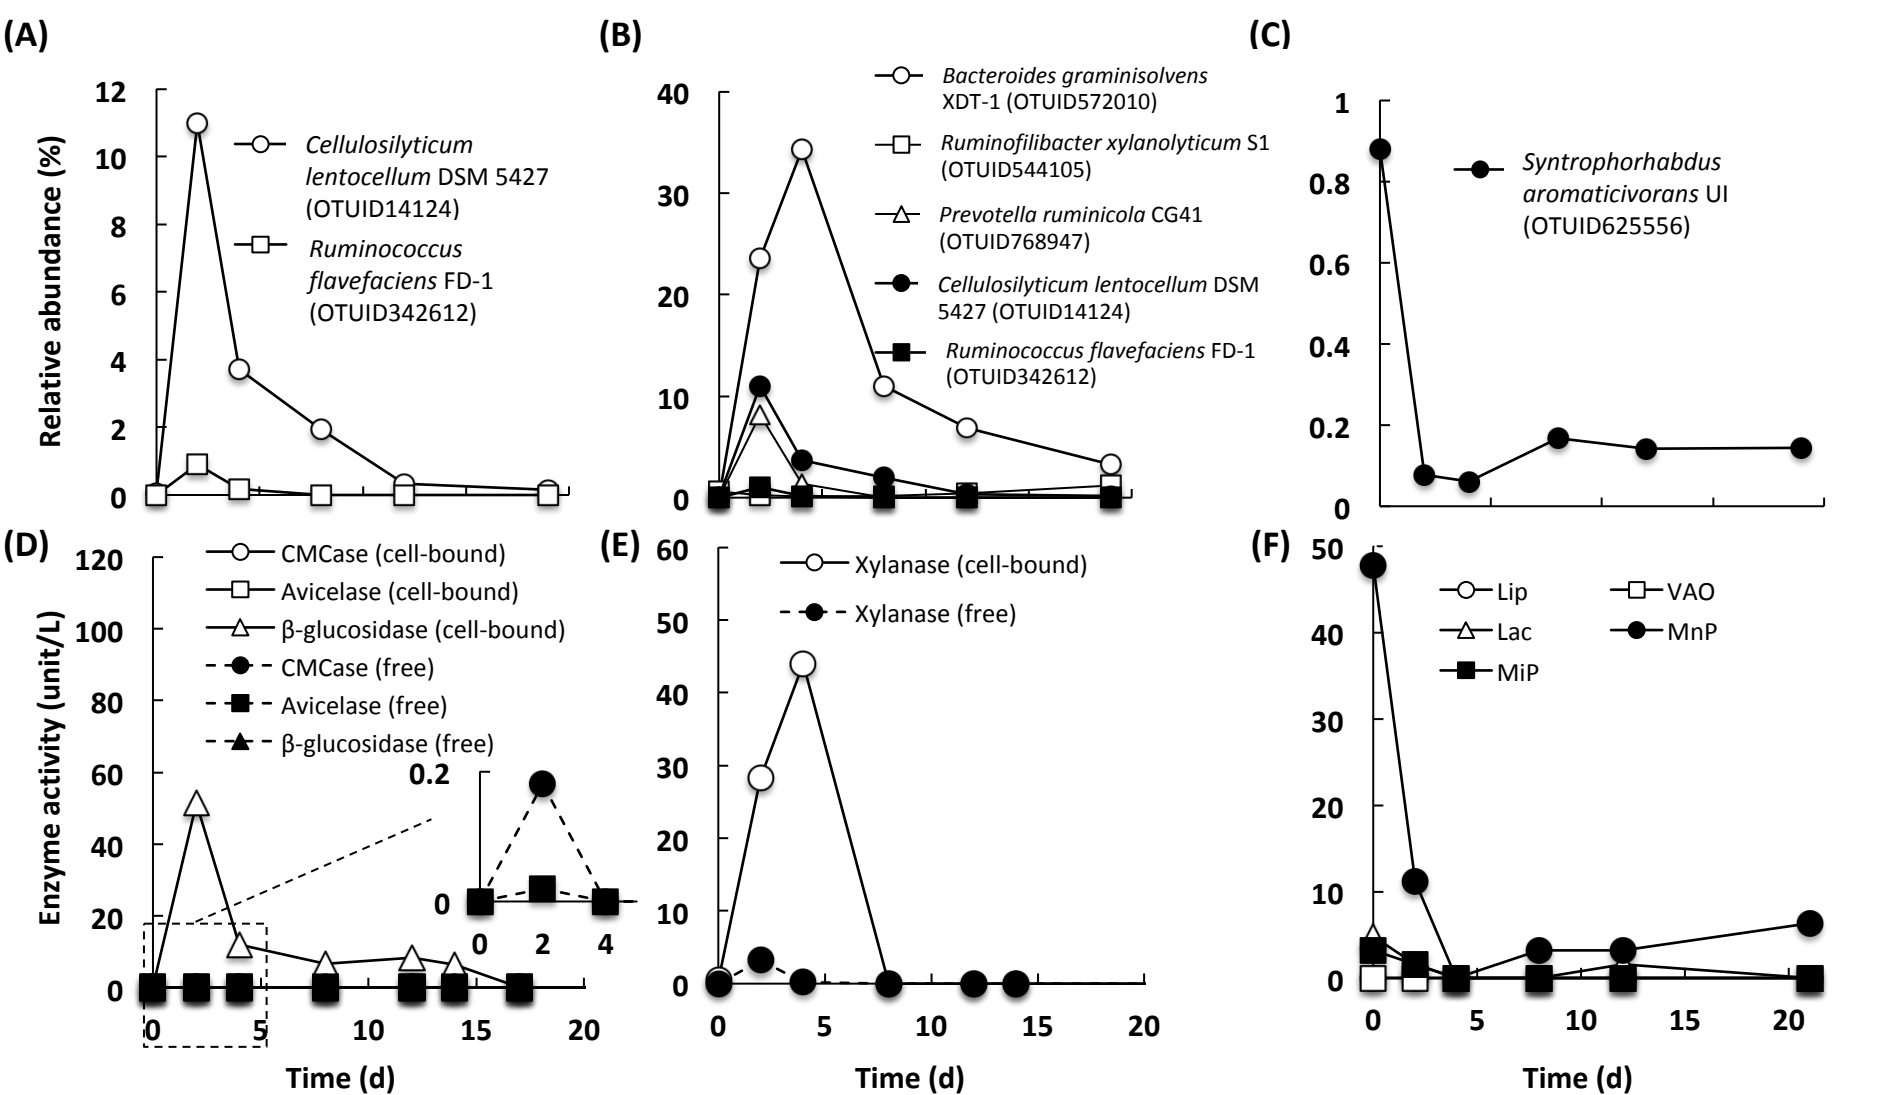

Fig. S6 (supplemental material)

Changes in the relative abundance of OTUs associated with known cellulose-degrading bacteria (A), xylan-degrading bacteria (B), or aromatic-degrading bacteria (C), and cellulase (D), xylanase (E), and ligninolytic enzyme (lignin peroxidase (Lip), veratryl alcohol oxidase (VAO), laccase (Lac), manganese peroxidase (MnP) and manganese-independent peroxidase (MiP)) (F) enzyme activities during methane fermentation of rapeseed. Subfigure (C) reports a subset of all detected aromatic-degrading bacteria.

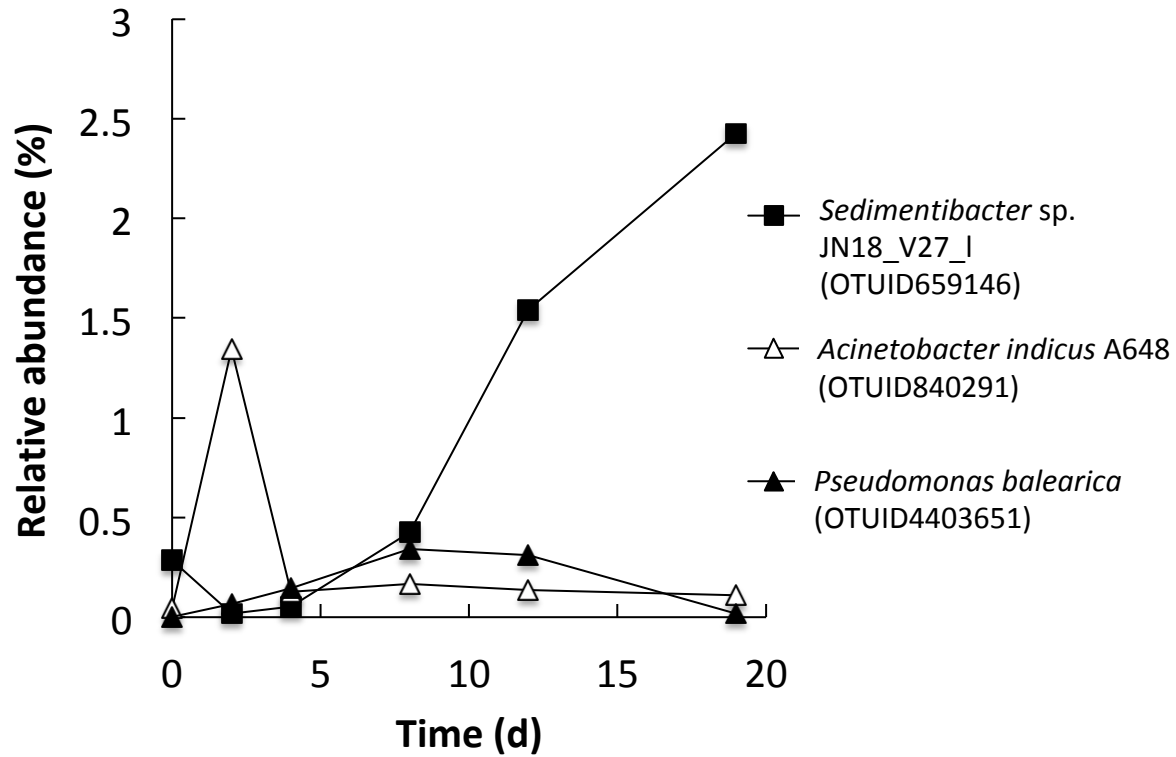

Fig. S7 (supplemental material)

Relative abundance of OTUs associated with known aromatic-degrading bacteria that did not mirror the dynamics of any lignin-degrading enzyme activities.

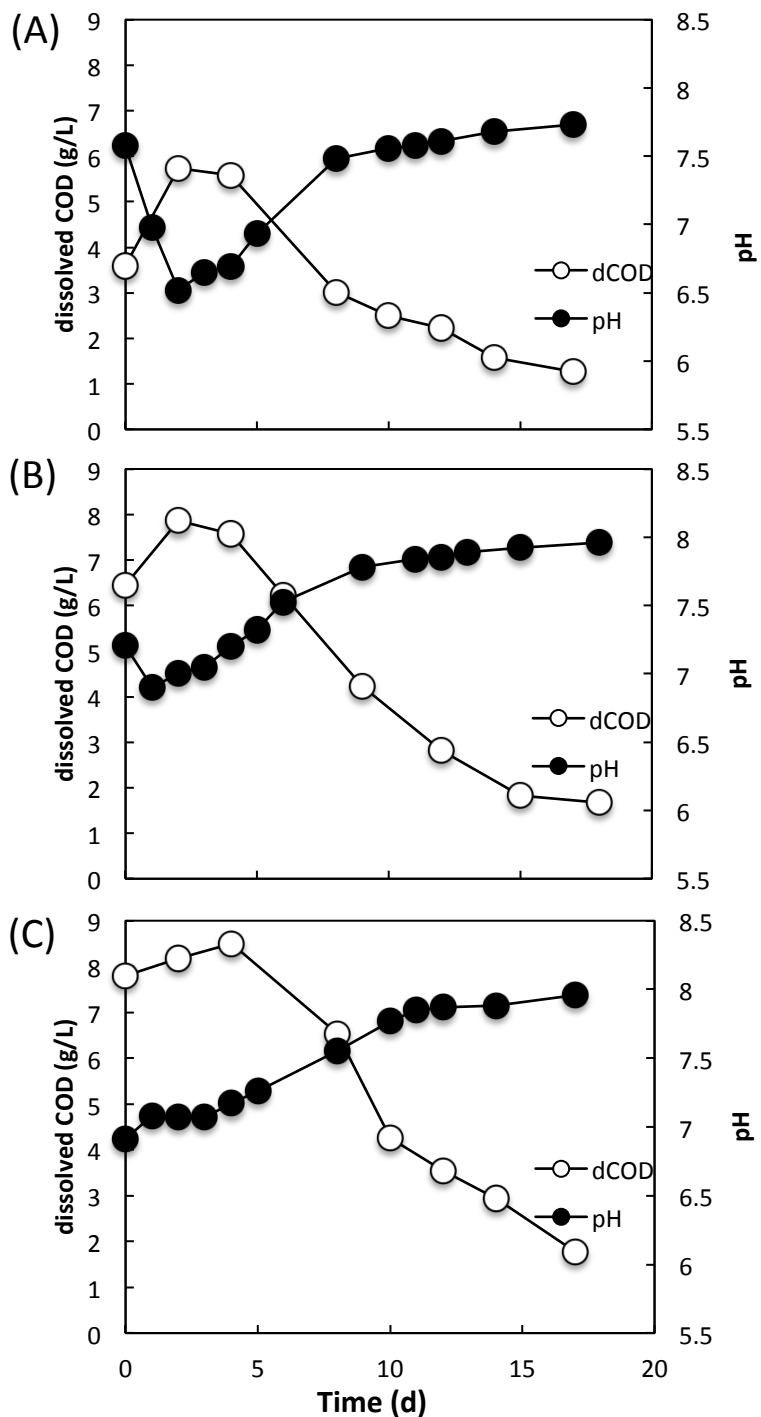

Fig. S8 (supplemental material)  
 Time course of dissolved COD and pH during methane fermentation fed untreated rapeseed (A) and rapeseed pretreated with rumen fluid for 6 h (B) and 24 h (C).



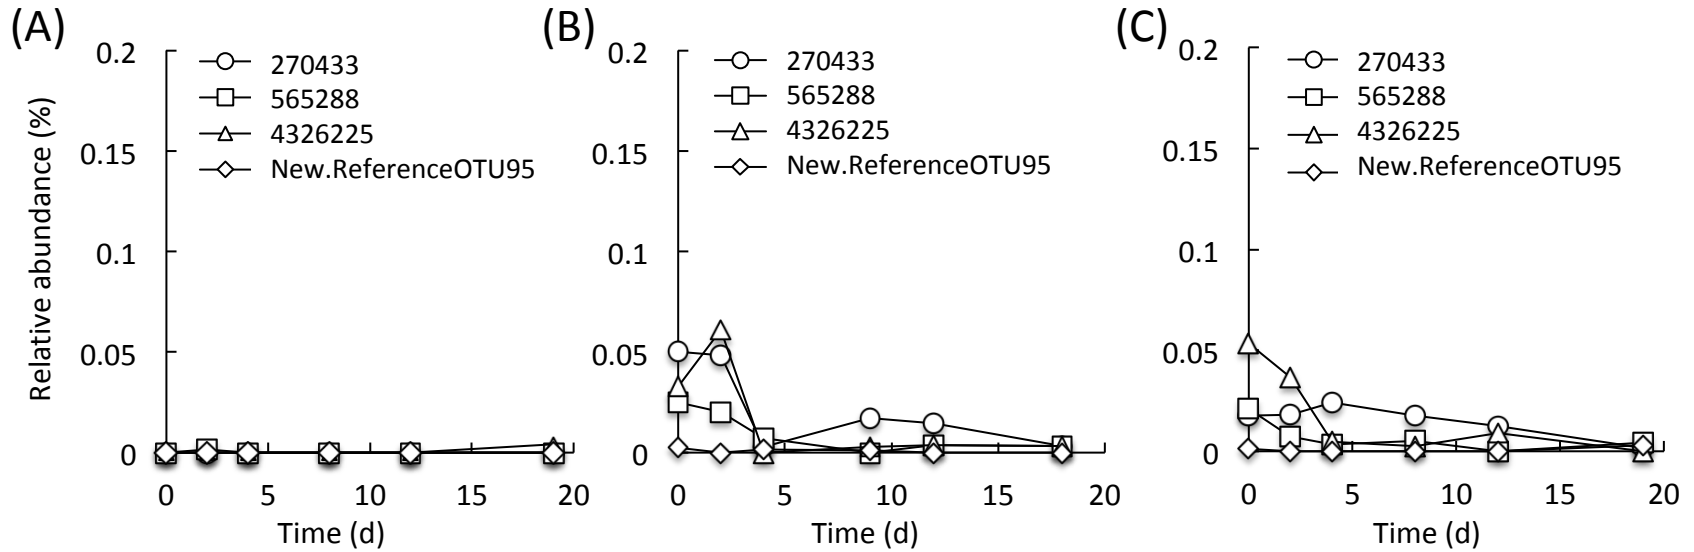

Fig. S9 (supplemental material)

Relative abundance of OTUs associated with *Ruminococcus albus* during methane fermentation fed untreated rapeseed (A) and rapeseed pretreated with rumen fluid for 6 h (B) and 24 h (C).

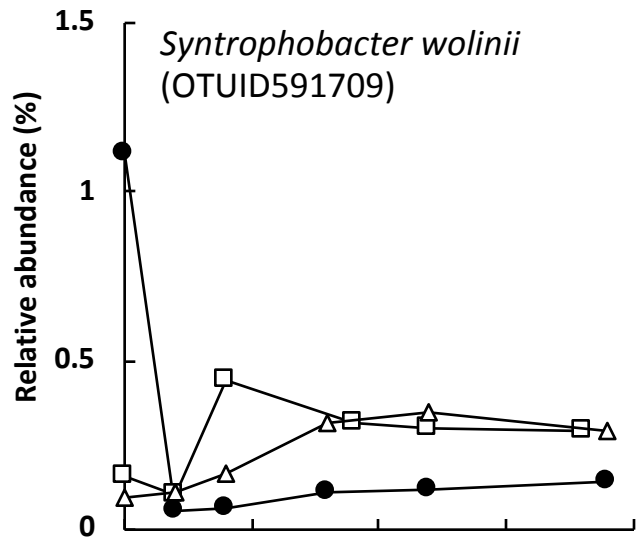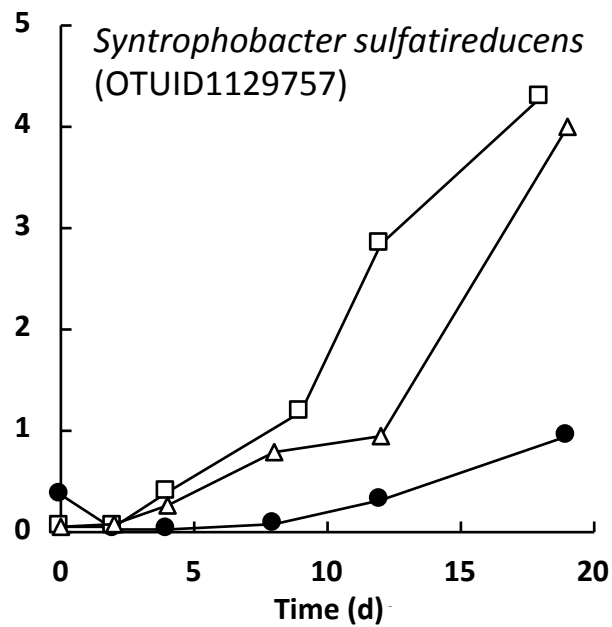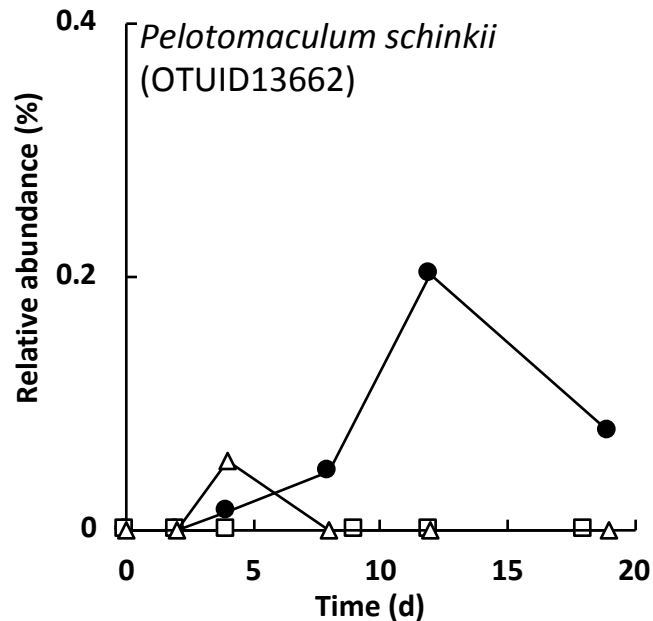

Fig. S10 (supplemental material)

Relative abundance of OTUs associated with known propionate-oxidizing bacteria during methane fermentation fed untreated rapeseed (●) and rapeseed pretreated with rumen fluid for 6 h (□) and 24 h (△).

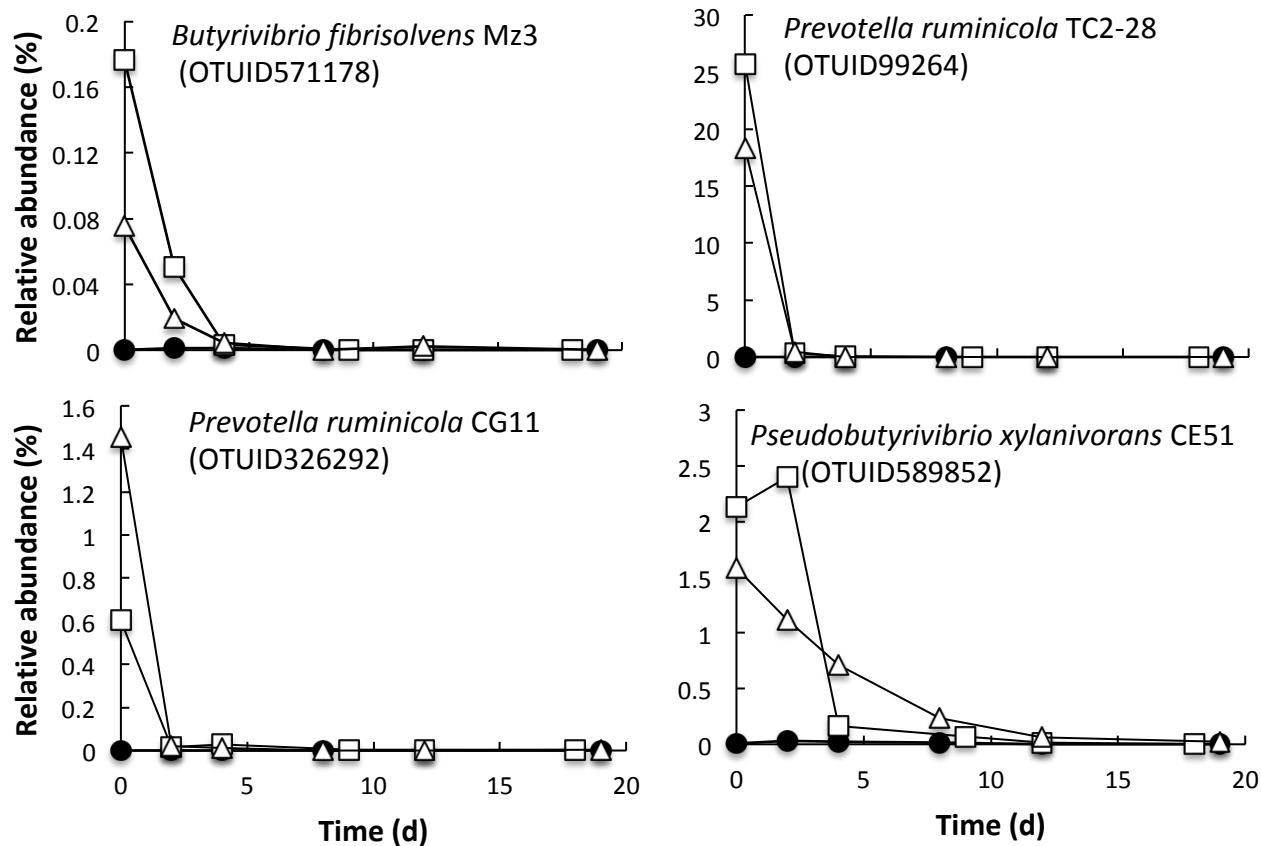

Fig. S11  
 Relative abundance of OTUs in Table S7 associated with known cellulolytic or xylanolytic rumen bacteria that were also detected in the untreated methane fermenter during methane fermentation fed untreated rapeseed (●) and rapeseed pretreated with rumen fluid for 6 h (□) and 24 h (△).

Table S1 Dissolved chemical oxygen demand (COD), volatile fatty acid (VFA) production, and pH after rumen fluid pretreatment for 6 and 24 h. <sup>a</sup>

|                                      | 0 h         | 6 h          | 24 h         |
|--------------------------------------|-------------|--------------|--------------|
| Dissolved COD (g/L)                  | 7.95 ± 0.23 | 20.10 ± 0.57 | 23.60 ± 0.42 |
| Volatile fatty acid production (g/L) |             |              |              |
| Acetic acid (g/L)                    | 2.79 ± 0.14 | 5.90 ± 0.24  | 8.10 ± 0.48  |
| Propionic acid (g/L)                 | 0.71 ± 0.05 | 2.03 ± 0.10  | 2.88 ± 0.20  |
| Isobutyric acid (g/L)                | 0.04 ± 0.01 | 0.12 ± 0.02  | 0.11 ± 0.03  |
| Butyric acid (g/L)                   | 0.47 ± 0.08 | 0.84 ± 0.06  | 1.49 ± 0.05  |
| Isovaleric acid (g/L)                | 0.09 ± 0.01 | 0.52 ± 0.61  | 0.13 ± 0.03  |
| Valeric acid (g/L)                   | 0.12 ± 0.16 | 0.09 ± 0.06  | 0.32 ± 0.02  |
| pH                                   | 7.12 ± 0.26 | 6.09 ± 0.13  | 5.49 ± 0.04  |
| Lignocellulose degradabilities (%)   |             |              |              |
| Cellulose                            | 0           | 27.2         | 72.1         |
| Hemicellulose                        | 0           | 16.8         | 36.7         |
| Lignin                               | 0           | 16.9         | 22.5         |

<sup>a</sup> This table was made from the data in [Baba et al. \(2017\)](https://doi.org/10.1016/j.jbiosc.2016.11.008)  
<https://doi.org/10.1016/j.jbiosc.2016.11.008>.

Table S2 *Synergistetes* taxa

| Taxon                  | Most abundant OTU ID | Closest relative species of 16S rRNA gene | Accession No. | Identities   |
|------------------------|----------------------|-------------------------------------------|---------------|--------------|
| <i>Aminobacterium</i>  | 4396596              | <i>Aminobacterium colombiense</i>         | NR_074624     | 435/442(98%) |
| <i>Thermovirgaceae</i> | 563237               | <i>Thermovirga lienii</i> Cas60314        | NR_043522     | 416/444(94%) |
| <i>HA73</i>            | 567883               | <i>Aminivibrio pyruvatiphilus</i> 4F6E    | NR_113331     | 436/442(99%) |
| <i>vadinCA02</i>       | 555847               | <i>Clostridiales</i> bacterium JN18_A24_M | DQ168655      | 428/442(97%) |

Table S3 *WWE1* taxa

| Taxon      | Most abundant OTU ID | Closest relative species of 16S rRNA gene      | Accession No. | Identities   |
|------------|----------------------|------------------------------------------------|---------------|--------------|
| <i>W22</i> | 539547               | <i>Cloacimonetes</i> bacterium JGI 0000059-L07 | KJ535434      | 457/467(98%) |
| <i>W5</i>  | 558528               | Uncultured bacterium clone ATB_CK_926_35       | KP150997      | 466/467(99%) |

Table S4 *Bacteroidetes* taxa

| Taxon (>1.0%)             | Most abundant OTU ID * | Closest relative species of 16S rRNA gene | Accession No. | Identities   |
|---------------------------|------------------------|-------------------------------------------|---------------|--------------|
| <i>Bacteroides</i>        | 572010 (C,P)           | <i>Bacteroides graminisolvens</i>         | NR_041642     | 459/460(99%) |
| <i>Porphyromonadaceae</i> | 4312424 (C)            | <i>Proteiniphilum acetatigenes</i>        | MK414692      | 447/460(97%) |
|                           | 541252 (P)             | <i>Petrimonas mucosa</i> ING2-E5A         | LT608328      | 459/460(99%) |
| <i>Prevotella</i>         | 768947 (C)             | <i>Prevotella ruminicola</i> CG41         | AB849451      | 459/460(99%) |
|                           | 99264 (P)              | <i>Prevotella ruminicola</i> TC2-28       | AF218619      | 432/461(94%) |
| <i>Bacteroidales</i>      | 45529 (C)              | Uncultured bacterium clone Ic118_27f      | HQ259855      | 457/459(99%) |
|                           | 574821 (P)             | <i>Bacteroidales</i> bacterium P13        | AB730729      | 449/460(98%) |
| <i>Marinilabiaceae</i>    | 544105 (C,P)           | <i>Ruminofilibacter xylanolyticum</i> S1  | DQ141183      | 458/460(99%) |
| <i>RF16</i>               | 100852 (C,P)           | Rumen bacterium YS3                       | AF544208      | 455/459(99%) |
| <i>S24-7</i>              | 336446 (C,P)           | Uncultured bacterium clone: Y14_2_39      | KF007168      | 413/464(89%) |
| <i>Paraprevotellaceae</i> | 143138 (C,P)           | <i>Bacteroidales</i> bacterium R61        | AB730657      | 459/460(99%) |

\* C, methane fermenter fed with untreated rapeseed (control); P, methane fermenter fed with pretreated rapeseed.

Table S5 Alpha diversity of bacterial communities in methane fermentation

|                | Control       | 6-h pretreatment           | 24-h pretreatment          |
|----------------|---------------|----------------------------|----------------------------|
| shannon        | 5.980 ± 0.216 | 8.028 ± 0.272 <sup>†</sup> | 8.262 ± 0.276 <sup>†</sup> |
| simpson        | 0.939 ± 0.015 | 0.975 ± 0.010 <sup>*</sup> | 0.982 ± 0.005 <sup>†</sup> |
| ACE            | 2290 ± 125    | 4269 ± 283 <sup>†</sup>    | 4278 ± 255 <sup>†</sup>    |
| chao1          | 2213 ± 119    | 4254 ± 269 <sup>†</sup>    | 4224 ± 261 <sup>†</sup>    |
| goods_coverage | 0.995 ± 0.001 | 0.992 ± 0.001              | 0.993 ± 0.001              |

<sup>\*</sup>  $P < 0.05$ , significantly different from the value of control (Mann–Whitney test)

<sup>†</sup>  $P < 0.01$ , significantly different from the value of control (Mann–Whitney test)



TableS6 OTUs related to methanogenic archaea detected in methane seed sludge.

| OTU ID | Relative species of 16S rRNA gene          | Accession no. | Identity     |
|--------|--------------------------------------------|---------------|--------------|
| 706555 | <i>Methanosarcina mazei</i> strain T40UCB9 | MG008504      | 421/424(99%) |
| 843826 | <i>Methanospirillum stamsii</i> strain ps  | NR_117705     | 412/419(98%) |
| 826668 | <i>Methanosaeta concilii</i> strain GP6    | NR_102903     | 421/424(99%) |
| 849920 | Methanogenic archaeon DCM1                 | GQ339876      | 413/423(98%) |
| 433016 | <i>Methanoculleus chikugoensis</i>         | KP702949      | 410/420(98%) |
| 557417 | <i>Methanospirillum</i> sp.Clone A2        | AJ133792      | 409/420(97%) |

Table S7 OTUs related to lignocellulose-degrading bacteria and methanogenic archaea detected in pretreatment fluid.<sup>a</sup>

| OTU ID               | Closest relative species of 16S rRNA gene      | Annotation <sup>b</sup> | Accession No. | Identities   |
|----------------------|------------------------------------------------|-------------------------|---------------|--------------|
| 270433               | <i>Ruminococcus albus</i> B199                 | C, X, O                 | AY445592      | 422/440(96%) |
| 293178               | <i>Ruminococcus flavefaciens</i> 17            | C, X, O                 | AM748742      | 421/440(96%) |
| 262032               | <i>Fibrobacter succinogenes</i> R              | C, X, O                 | AJ505938      | 456/458(99%) |
| 571178               | <i>Butyrivibrio fibrisolvens</i> Mz3           | C, X, O                 | AM039822      | 438/441(99%) |
| 14124                | <i>Cellulosilyticum lentocellum</i> DSM 5427   | C, X, O                 | NR_074536     | 440/442(99%) |
| 99264                | <i>Prevotella ruminicola</i> TC2-28            | X, O                    | AF218619      | 432/461(94%) |
| 326292               | <i>Prevotella ruminicola</i> CG11              | X, O                    | AB849444      | 426/460(93%) |
| 589852               | <i>Pseudobutyrvibrio xylanivorans</i> CE51     | X, O                    | AM039824      | 439/440(99%) |
| 554176               | <i>Eubacterium uniforme</i> X3C39              | X, O                    | NR_104842     | 438/440(99%) |
| 572010               | <i>Bacteroides graminisolvens</i> XDT-1        | X, O                    | NR_041642     | 458/460(99%) |
| 101860               | <i>Lachnospira multipara</i> D32 (ATCC19207)   | O                       | NR_104758     | 439/440(99%) |
| 805261               | <i>Succinivibrio dextrinosolvens</i> CA81      | O                       | AB849337      | 427/440(97%) |
| 539567               | <i>Mesotoga infera</i> VNs100                  | O                       | NR_117646     | 464/467(99%) |
| 303161               | <i>Streptococcus equinus</i> HC5               | O                       | KF573427      | 464/465(99%) |
| 584375               | <i>Bifidobacterium adolescentis</i> JCM 1275   | O                       | LC071806      | 447/449(99%) |
| 576472               | <i>Bacteroides plebeius</i> M12                | O                       | NR_041277     | 423/460(92%) |
| N <sup>b</sup> 10999 | <i>Prevotella copri</i> JCM 13464              | O                       | NR_113411     | 423/460(92%) |
| 4336330              | <i>Xanthomonas sacchari</i> AF54               | O                       | LC015609      | 461/465(99%) |
| 659146               | <i>Sedimentibacter hydroxybenzoicus</i> JW/Z-1 | A                       | NR_029146     | 421/442(95%) |
| 840291               | <i>Acinetobacter indicus</i> A648              | A                       | NR_117784     | 465/466(99%) |
| 261405               | <i>Soehngenia saccharolytica</i> DSM 12858     | A                       | NR_117382     | 435/439(99%) |
| 586744               | <i>Brachymonas denitrificans</i> AS-P1         | A                       | NR_025834     | 447/465(96%) |
| 625556               | <i>Syntrophorhabdus aromaticivorans</i> UI     | A                       | NR_041306     | 440/469(94%) |
| 842598               | <i>Methanobrevibacter</i> sp. G16              | M                       | KF697729      | 422/424(99%) |
| 565174               | <i>Methanospaera stadmanae</i> DSM 3091        | M                       | CP000102      | 416/424(98%) |
| 153647               | <i>Methanospaera</i> sp. ISO3-F5               | M                       | KF697734      | 415/424(98%) |
| 826668               | <i>Methanosaeta concilii</i> GP6               | M                       | NR_102903     | 421/424(99%) |

<sup>a</sup> This table was made using the data in [Baba et al. \(2017\) \(https://doi.org/10.1016/j.jbiosc.2016.11.008\)](https://doi.org/10.1016/j.jbiosc.2016.11.008).

<sup>b</sup> C, cellulose-degrading bacteria; X, xylan-degrading bacteria; A, aromatic-degrading bacteria; O, cello-oligosaccharide-degrading bacteria; M, methanogenic archaea

OTUs marked with gray color were not detected in methane seed sludge but were endemic to pretreatment (rumen) fluid.

Table S8 Propionate-oxidizing bacteria

| OTU ID  | Closest relative species of 16S rRNA gene     | Accession No. | Identities   |
|---------|-----------------------------------------------|---------------|--------------|
| 591709  | <i>Syntrophobacter wolinii</i>                | X70906        | 449/467(96%) |
| 1129757 | <i>Syntrophobacter sulfatireducens</i> TB8106 | NR_043073     | 465/466(99%) |
| 13662   | <i>Pelotomaculum schinkii</i> HH              | NR_119207     | 441/444(99%) |
